# Supplementary material
Source: PubMed Central journal article supplement (PMC4446734)
Supplement: supp_128.9.1835_JCS167643.pdf [file supp_128.9.1835_JCS167643.pdf]

Figure S1.

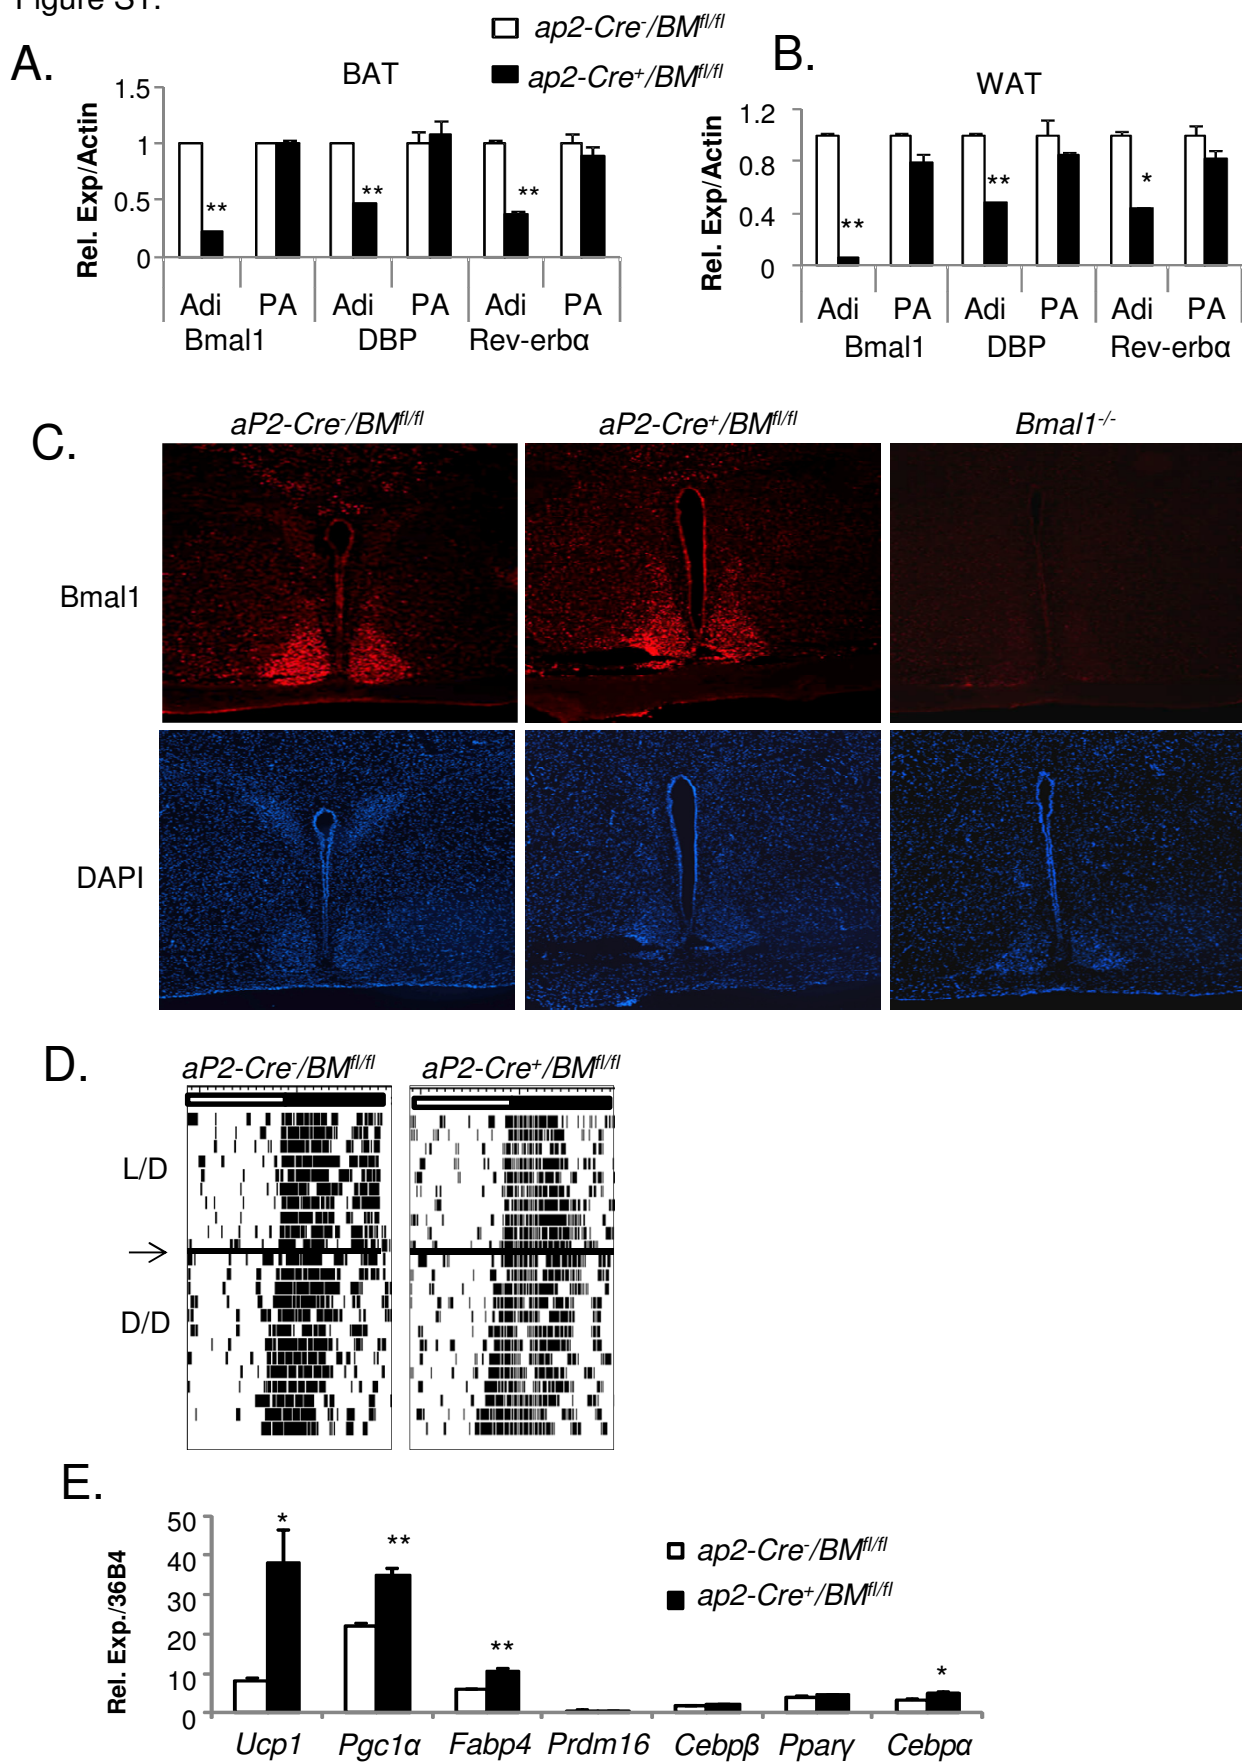

Figure S2.

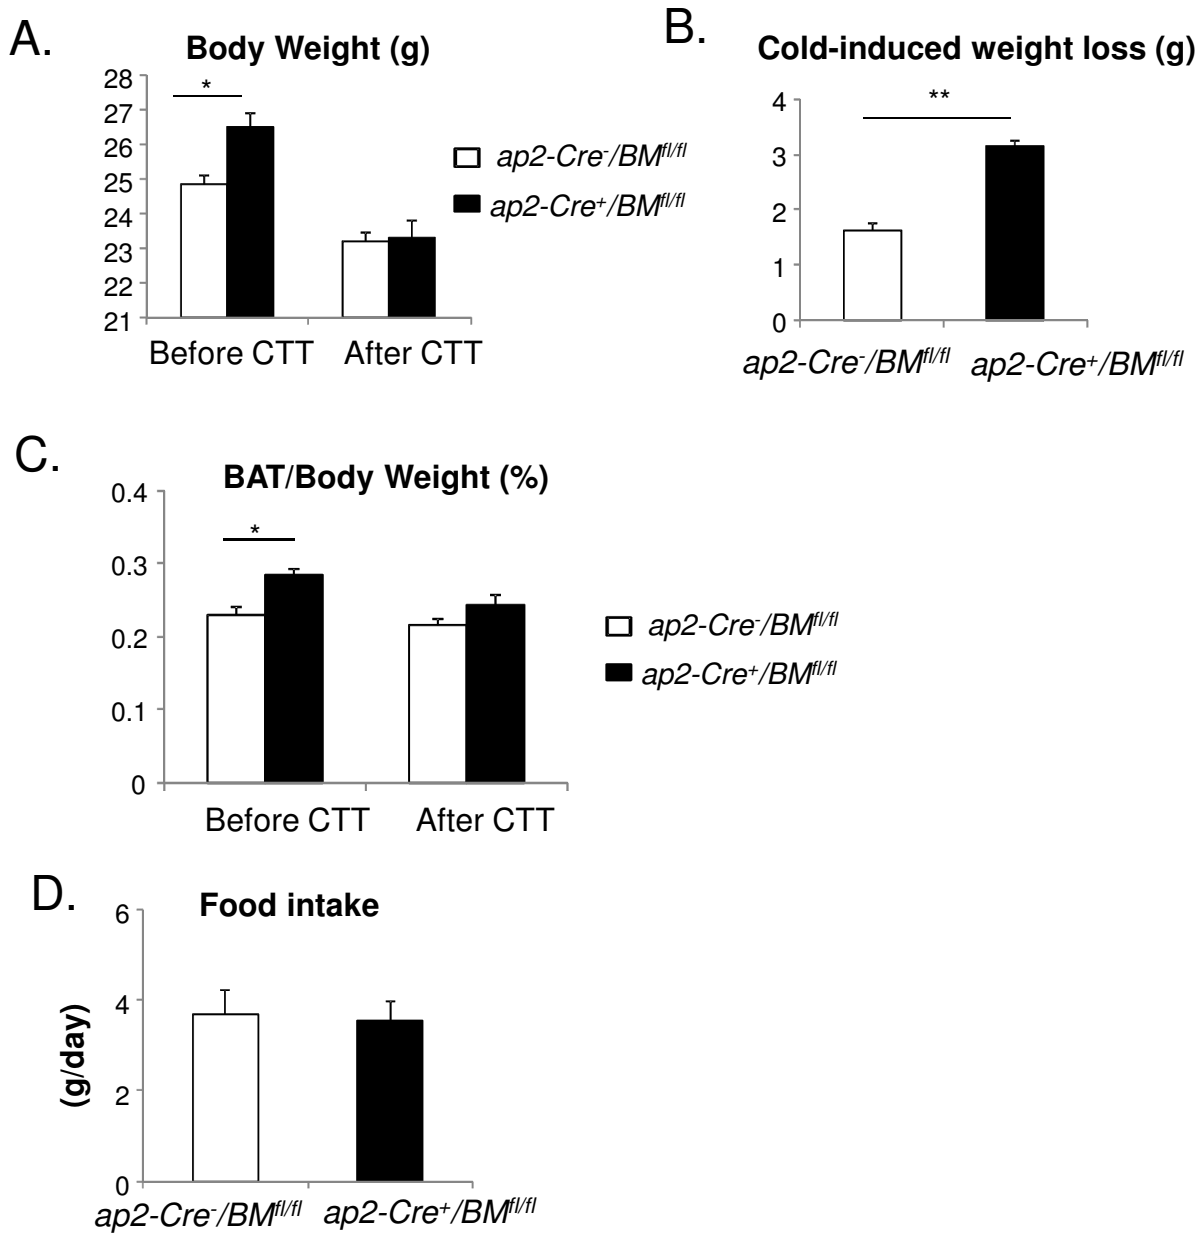

Figure S3.

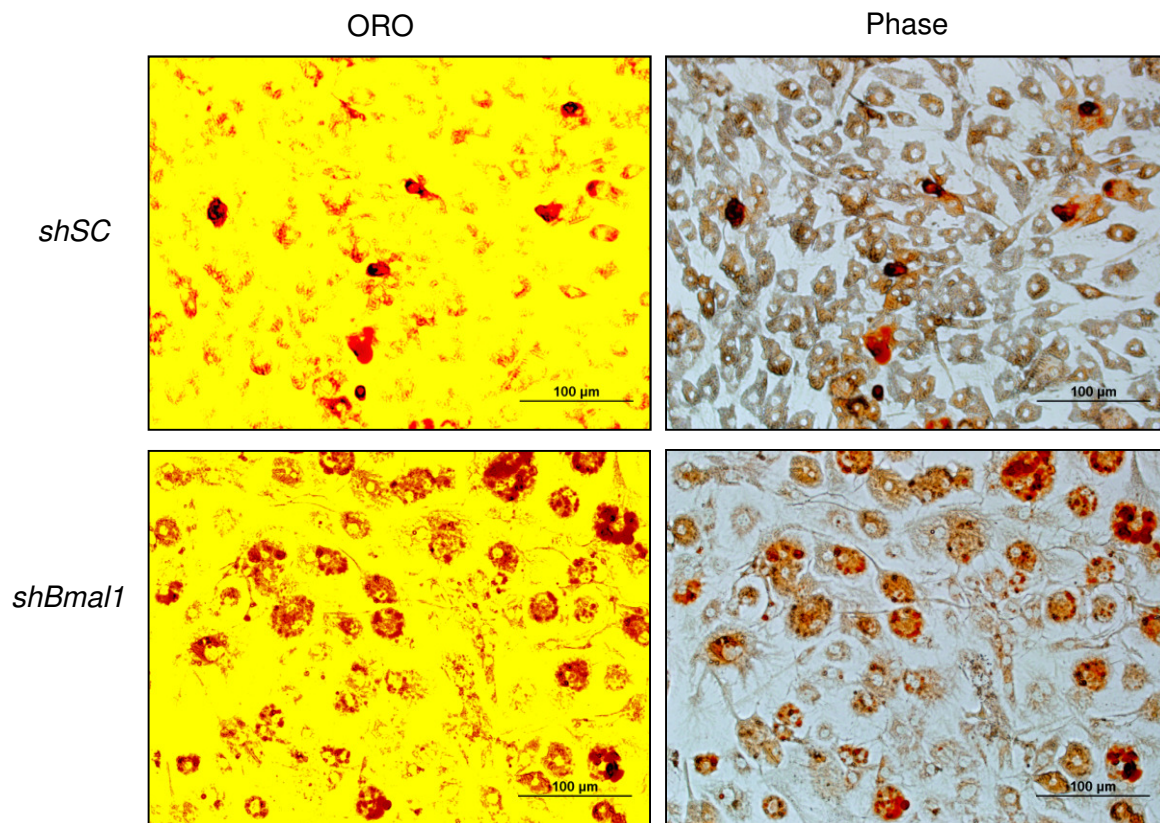

## Supplemental Figure Legends

Figure S1. Adipose-specific ablation of *Bmal1* in *ap2-Cre<sup>+</sup>/BM<sup>fl/fl</sup>* mice with intact central clock function. (A, B) Characterization of *Bmal1* deletion in brown and white adipose tissue of *ap2-Cre<sup>+</sup>/BM<sup>fl/fl</sup>* and littermate *ap2-Cre<sup>-</sup>/BM<sup>fl/fl</sup>* mice. Loss of *Bmal1* expression in mature adipocytes but not preadipocytes isolated from *ap2-Cre<sup>+</sup>/BM<sup>fl/fl</sup>* brown (A), or white adipose tissue (B), as analyzed by RT-qPCR. Adi: adipocytes; PA: preadipocytes. (C, D) Intact central clock in *ap2-Cre<sup>+</sup>/BM<sup>fl/fl</sup>* mice. Representative images of *Bmal1* immunostaining in the central clock, suprachiasmatic nuclei (C), and circadian locomotor activity as monitored by wheel-running actograms to assess central clock function (D) in *ap2-Cre<sup>-</sup>/BM<sup>fl/fl</sup>* and *ap2-Cre<sup>+</sup>/BM<sup>fl/fl</sup>* mice. *Bmal1<sup>-/-</sup>* mice were included as negative controls for the immunostaining. Actograms were performed on mice kept in normal light/dark cycles for 10 days before switching to dark/dark cycles for 14 days (n=6/group). (E) RT-qPCR analysis of brown adipogenic gene expression in BAT of *ap2-Cre<sup>-</sup>/BM<sup>fl/fl</sup>* and *ap2-Cre<sup>+</sup>/BM<sup>fl/fl</sup>* mice at ZT10 (5PM) (n=6/group). \*, \*\*: P<0.05 and 0.01 *ap2-Cre<sup>+</sup>/BM<sup>fl/fl</sup>* vs. *ap2-Cre<sup>-</sup>/BM<sup>fl/fl</sup>*.

Figure S2. Body weight and brown fat weight change before and after cold tolerance test in *ap2-Cre<sup>-</sup>/BM<sup>fl/fl</sup>* and *ap2-Cre<sup>+</sup>/BM<sup>fl/fl</sup>* mice. (A-C) Body weight (A), body weight loss after cold tolerance (B) and brown fat to body weight ratio (C) before and after cold tolerance test at 4°C for 8 hours (CTT). N=6-7/group, \*, \*\*: P<0.05 and 0.01 *ap2-Cre<sup>+</sup>/BM<sup>fl/fl</sup>* vs. *ap2-Cre<sup>-</sup>/BM<sup>fl/fl</sup>*. D. Average daily food intake as measured by CLAMS unit monitoring of *ap2-Cre<sup>-</sup>/BM<sup>fl/fl</sup>* and *ap2-Cre<sup>+</sup>/BM<sup>fl/fl</sup>* mice. Food intake is monitored for 5 days under ambient temperature (22°C) and average daily intake was calculated (n=6-7/group).

Figure S3. Representative images of Oil-Red-O staining (left panels) and phase-contrast (right panels) of day 10-differentiated shSC and sh*Bmal1* C3H10T1/2 cells (20X).

Table S1 Complete dataset of KEGG pathway analysis of microarray results of differentially regulated genes in *Bmal1* KD vs. SC C3H10T1/2 cells with adjusted P value ≤ 0.05.

[Download Table S1.](#)

Table S2. Bmal1 E-box elements identified on TGF- $\beta$  pathway gene promoters.

| <b>Gene Name</b> | <b>Chromosome</b> | <b>E-box Sequence</b> | <b>TSS Distance</b> |
|------------------|-------------------|-----------------------|---------------------|
| Rev-erba         | Chr11             | CACGTG                | -17                 |
| TGFb1            | Chr7              | CACGTG                | -642                |
| TGFb2            | Chr1              | CACGTG                | -50                 |
| TGFbr2           | Chr9              | CACGTG                | -785                |
| Smad3            | Chr9              | CACGTG                | -323                |

Table S3. Primer sequences for ChIP analysis of candidate Bmal1 targets.

| <b>Genes</b> |         | <b>Sequences</b>          |
|--------------|---------|---------------------------|
| Tbp          | Forward | CCACACCCGCCACCAGTTCG      |
|              | Reverse | TACAGCCCGGGGAGCATCGT      |
| Rev-erba     | Forward | TTCCCTGGGACAGAGGGCTCT     |
|              | Reverse | TACAAATCCCAACAATCCTGGCGGT |
| TGFb1        | Forward | AGTGGAGTGTTGAGGGACTT      |
|              | Reverse | TGATCAGGACTGACAGTCTC      |
| TGFb2        | Forward | TTCTCTCTTTCTCTCCCACTC     |
|              | Reverse | AACAGAGGACTTCTGACTGT      |
| TGFbr2       | Forward | TTTGCTGGGTGAAGCTCTGT      |
|              | Reverse | TGCCCTGGAACACTCACTCTGTA   |
| Smad3        | Forward | ACAGACTCTCAGATACCGTTGCA   |
|              | Reverse | TTCCTGATCTCACCCAGCAGGAA   |

Table S4. Primary antibodies used in the study.

| <b>Antibody</b> | <b>Host</b> | <b>Vendor</b>               | <b>Dilution</b> |
|-----------------|-------------|-----------------------------|-----------------|
| Bmal1           | Rabbit      | Abcam                       | 1:1,000         |
| UCP-1           | Rabbit      | Millipore                   | 1: 5,000        |
| Smad3           | Rabbit      | Cell Signaling              | 1:1,000         |
| P-Smad3         | Rabbit      | Cell Signaling              | 1:1,000         |
| Smad5           | Rabbit      | Cell Signaling              | 1:1,000         |
| P-Smad5         | Rabbit      | Cell Signaling              | 1:1,000         |
| b-actin         | Mouse       | Sigma-Aldrich               | 1:10,000        |
| TBP             | Rabbit      | Santa Cruz<br>Biotechnology | 1:1,000         |
